# Supplementary material
Source: Research Square preprint supplement (doi:10.21203/rs.3.rs-9524228/v1)
Supplement: Supplementary file 1 [file 64a230f5da510a674c031848.docx]

**TRIPOD+AI Checklist**

**Manuscript Title:**

Predicting Non-successful Ageing in Rural South Africa: A Prospective Cohort Study using Machine-Learning Analysis of the HAALSI Cohort.

| **Section/Topic** | **Item** | **Type** | **Checklist Item Requirement** | **Reported Application to Study** |
| --- | --- | --- | --- | --- |
| TITLE | 1 | D:E | Identify the study as developing or evaluating a multivariable prediction model, target population, and outcome. | Reported. The title identifies a prospective cohort study using machine learning to predict non-successful aging in rural South Africa. |
| ABSTRACT | 2 | D:E | Provide a summary of objectives, design, setting, participants, predictors, outcome, model type, and performance. | Reported. The abstract covers the HAALSI cohort, XGBoost/ANN models, 1,435 participants, and AUC results. |
| INTRODUCTION |  |  |  |  |
| Background | 3a | D:E | Explain the healthcare context, rationale for the model, and references to existing models. | Reported. Contextualized within South African aging, multimorbidity, and socioeconomic inequality. |
|  | 3b | D:E | Describe target population and intended purpose in the care pathway. | Reported. Targeted at identifying vulnerable older adults in rural settings for potential health screenings. |
|  | 3c | D:E | Describe any known health inequalities between sociodemographic groups. | Reported. Highlights divergence in later-life outcomes driven by long-term structural inequality and household vulnerability. |
| Objectives | 4 | D:E | Specify study objectives (development, validation, or both). | Reported. Aims to quantify predictive gain from longitudinal change and identify influential predictors via SHAP. |
| METHODS |  |  |  |  |
| Data | 5a | D:E | Describe sources of data (e.g., cohort) and representativeness. | Reported. Uses the HAALSI population-based cohort; notes the final sample is a cleaned survivor subset. |
|  | 5b | D:E | Specify dates of data collection and follow-up. | Reported. Wave 1 (2014–2015), Wave 2 (2018–2019), and Wave 3 (2021–2022). |
| Participants | 6a | D:E | Specify study setting and location of centers. | Reported. Agincourt sub-district, Mpumalanga Province, South Africa. |
|  | 6b | D:E | Describe eligibility criteria for study participants. | Reported. Adults aged 40+ with valid Wave 3 outcomes and complete longitudinal data. |
|  | 6c | D:E | Details of treatments received and how they were handled. | Not Applicable. The study focuses on predictors and outcomes without specific clinical treatment interventions. |
| Data Prep | 7 | D:E | Describe pre-processing and quality checking. | Reported. Includes data hygiene screening for physiologically implausible changes in BMI and mental health. |
| Outcome | 8a | D:E | Define outcome and time horizon, including how/when assessed. | Reported. Non-successful aging at Wave 3, defined by functional limitation or psychological distress. |
|  | 8b | D:E | Qualifications of outcome assessors (if subjective). | Not Applicable. Outcome based on objective gait speed and standardized CES-D/self-report scales. |
|  | 8c | D:E | Actions to blind assessment of the outcome. | Not Applicable. Secondary analysis of existing longitudinal survey data. |
| Predictors | 9a | D | Choice of initial predictors and pre-selection methods. | Reported. Predictors grouped into nested tiers based on baseline, longitudinal change, and proximal status. |
|  | 9b | D:E | Define all predictors and how/when measured. | Reported. Defined as age, sex, asset index, BMI change, and CES-D scores measured across three waves. |
|  | 9c | D:E | Qualifications of predictor assessors (if subjective). | Not Applicable. Standardized survey and anthropometric measurements. |
| Sample Size | 10 | D:E | Explain how study size was arrived at and justification. | Reported. Staged exclusion process resulting in 1,435 participants for complete-case analysis. |
| Missing Data | 11 | D:E | Describe how missing data were handled and reasons for omission. | Reported. Complete-case analysis used; reasons for exclusion (attrition, mortality, artifacts) are detailed. |
| Analytics | 12a | D | Describe data usage (partitioning) for development/evaluation. | Reported. Internal validation conducted using repeated 10-fold cross-validation with five repeats. |
|  | 12b | D | Handling of predictors (rescaling, transformation). | Reported. XGBoost analyzed on original scale; ANN inputs were standardized. |
|  | 12c | D | Model type, rationale, hyperparameter tuning, and internal validation. | Reported. XGBoost and constrained ANN; rationale for modeling non-linear patterns and cross-validation details provided. |
|  | 12d | D:E | Handling of heterogeneity across clusters (hospitals/countries). | Not Applicable. Single-site community cohort study. |
|  | 12e | D:E | Measures/plots used to evaluate performance (discrimination/calibration). | Reported. AUC scores, calibration plots, slope, intercept, and SHAP beeswarm plots.+4 |
|  | 12f | E | Model updating/recalibration from evaluation. | Not Applicable. Model was evaluated as developed; no recalibration reported. |
|  | 12g | E | Calculation of model predictions (formula/code). | Not Applicable. Predictions described via algorithmic framework (XGBoost/ANN) rather than a shared static formula. |
| Imbalance | 13 | D:E | Methods used for class imbalance and subsequent recalibration. | Not Applicable. No specific class imbalance correction methods mentioned. |
| Fairness | 14 | D:E | Approaches used to address model fairness and rationale. | Reported. Addressed through cumulative disadvantage theory and analyzing asset index/socioeconomic gradient. |
| Output | 15 | D | Specify model output (probabilities, classification). | Reported. Binary classification of risk scores and predicted probabilities. |
| Training/Eval | 16 | D:E | Differences between development and evaluation data. | Reported. Comparison of included participants vs. excluded group shows healthy-survivor bias in evaluation data. |
| Ethics | 17 | D:E | Ethics committee name and participant informed consent. | Reported. Approved by University of the Witwatersrand, Harvard, and Mpumalanga ethics committees. |
| OPEN SCIENCE |  |  |  |  |
| Funding | 18a | D:E | Source of funding and role of funders. | Reported. No specific grant received. |
| Conflicts | 18b | D:E | Conflicts of interest and financial disclosures. | Reported. Authors declare no competing interests. |
| Registration | 18c-d | D:E | Protocol access and registration number. | Not Applicable. Study not registered as a clinical trial; protocol not separately published. |
| Data/Code | 18e-f | D:E | Availability of study data and analytical code. | Reported. Data available via HAALSI website upon application; restrictions apply. |
| P & PI | 19 | D:E | Details of patient and public involvement. | Reported. Patients or public were not involved in the design or conduct of this secondary analysis. |
| RESULTS |  |  |  |  |
| Participants | 20a | D:E | Flow of participants (including diagram). | Reported. Detailed attrition flow provided in text and Table 1. |
|  | 20b | D:E | Characteristics of participants and missing data reports. | Reported. Participant characteristics and exclusions based on demographics and data hygiene are listed. |
|  | 20c | E | Comparison of development and evaluation data distribution. | Reported. Comparison between retained and excluded participants provided. |
| Development | 21 | E | Number of participants and outcome events in each analysis. | Reported. Sample size of 1,435 adults for model development and evaluation. |
| Specification | 22 | D | Full details of prediction model for third-party implementation. | Not Applicable. Full model weights/objects for implementation not included in manuscript text. |
| Performance | 23a | D:E | Performance estimates with confidence intervals/plots. | Reported. AUC scores (0.774-0.860) with standard deviations and calibration plot provided. |
|  | 23b | D:E | Results of heterogeneity across clusters. | Not Applicable. Single community cohort. |
| Updating | 24 | E | Results from model updating/recalibration. | Not Applicable. No model updating performed. |
| DISCUSSION |  |  |  |  |
| Interpretation | 25 | D:E | Overall interpretation of results and fairness. | Reported. Discusses the joint importance of material conditions, bodily change, and psychological status. |
| Limitations | 26 | D:E | Discussion of bias, sample size, overfitting, and generalizability. | Reported. Acknowledges survivor bias, restricted sample, and lack of external validation. |
| Usability | 27a-b | D | How to assess poor quality data and user interaction requirements. | Not Applicable. Model not yet formatted for active clinical implementation. |
|  | 27c | D:E | Next steps for future research and applicability. | Reported. Recommends monitoring asset stability and BMI trends as early warning signs. |
